# Supplementary material for: Arabidopsis miR171-Targeted Scarecrow-Like Proteins Bind to GT cis-Elements and Mediate Gibberellin-Regulated Chlorophyll Biosynthesis under Light Conditions
Source: PubMed Central journal article supplement (PMC4125095; doi:10.1371/journal.pgen.1004519), 2014-08-07

**A**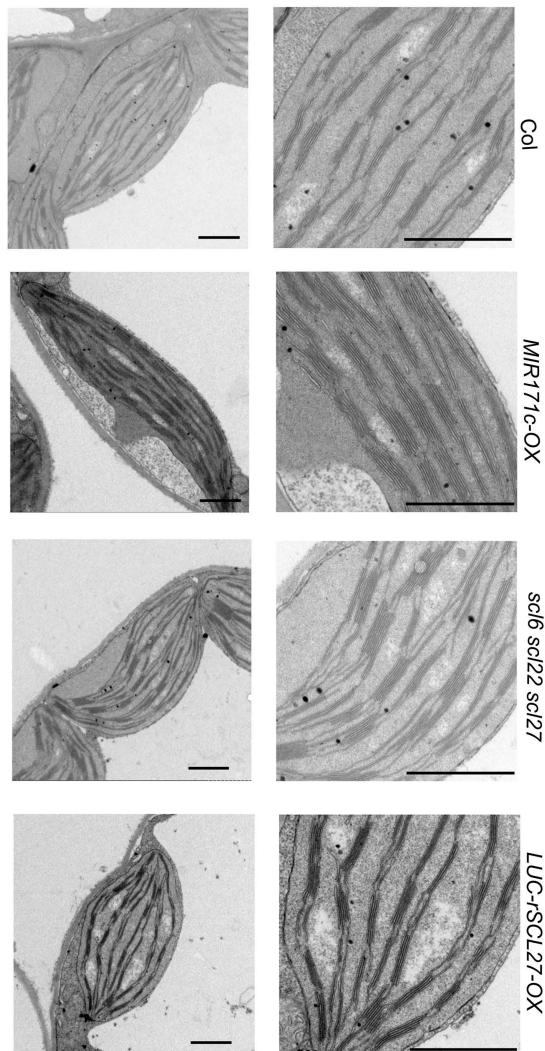**B**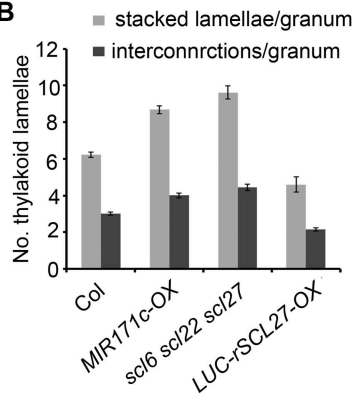**C**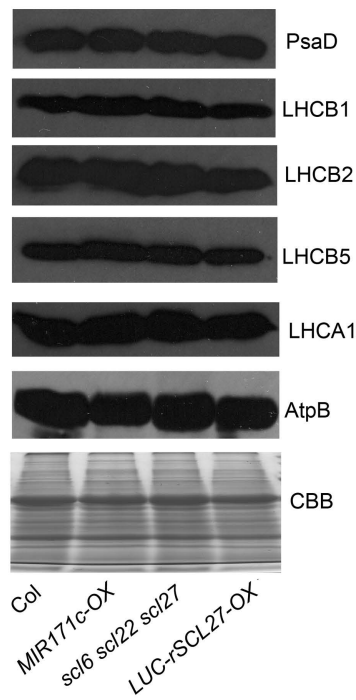

Supplement: pgen.1004519.s004.pdf [file pgen.1004519.s004.pdf]
